# Supplementary material for: Identification of TLN1 as a prognostic biomarker to effect cell proliferation and differentiation in Acute Myeloid Leukemia
Source: Research Square preprint supplement (doi:10.21203/rs.3.rs-1406296/v1), 2022-03-16
Supplement: Supplementary file 1 [file 42949e64210fec499609d61e.xlsx]

## Sheet: Sheet 1
Table1: | TCGA AML patient characteristics and TLN1 expression correlated with clinical characteristics
Characteristic	Low expression of TLN1	High expression of TLN1	p	statistic
N	75	76
Gender, n (%)			0.061	3.51
Female	40 (26.5%)	28 (18.5%)
Male	35 (23.2%)	48 (31.8%)
Race, n (%)			0.887
Asian	0 (0%)	1 (0.7%)
Black or African American	7 (4.7%)	6 (4%)
White	66 (44.3%)	69 (46.3%)
Age, n (%)			0.025*	5.03
<=60	51 (33.8%)	37 (24.5%)
>60	24 (15.9%)	39 (25.8%)
WBC count(x10^9/L), n (%)			0.417	0.66
<=20	35 (23.3%)	42 (28%)
>20	39 (26%)	34 (22.7%)
BM blasts(%), n (%)			0.444	0.59
<=20	27 (17.9%)	33 (21.9%)
>20	48 (31.8%)	43 (28.5%)
PB blasts(%), n (%)			0.932	0.01
<=70	35 (23.2%)	37 (24.5%)
>70	40 (26.5%)	39 (25.8%)
Cytogenetic risk, n (%)			0.077	5.12
Favorable	21 (14.1%)	10 (6.7%)
Intermediate	37 (24.8%)	45 (30.2%)
Poor	16 (10.7%)	20 (13.4%)
FAB classifications, n (%)			0.121	11.42
M0	9 (6%)	6 (4%)
M1	17 (11.3%)	18 (12%)
M2	21 (14%)	17 (11.3%)
M3	11 (7.3%)	4 (2.7%)
M4	12 (8%)	17 (11.3%)
M5	4 (2.7%)	11 (7.3%)
M6	0 (0%)	2 (1.3%)
M7	0 (0%)	1 (0.7%)
Cytogenetics, n (%)			0.237	10.41
Normal	32 (23.7%)	37 (27.4%)
+8	4 (3%)	4 (3%)
del(5)	1 (0.7%)	0 (0%)
del(7)	1 (0.7%)	5 (3.7%)
inv(16)	5 (3.7%)	3 (2.2%)
t(15;17)	7 (5.2%)	4 (3%)
t(8;21)	6 (4.4%)	1 (0.7%)
t(9;11)	0 (0%)	1 (0.7%)
Complex	14 (10.4%)	10 (7.4%)
FLT3 mutation, n (%)			0.846	0.04
Negative	51 (34.7%)	51 (34.7%)
Positive	24 (16.3%)	21 (14.3%)
IDH1 R132 mutation, n (%)			0.235	1.41
Negative	65 (43.6%)	71 (47.7%)
Positive	9 (6%)	4 (2.7%)
IDH1 R140 mutation, n (%)			0.745	0.11
Negative	70 (47%)	67 (45%)
Positive	5 (3.4%)	7 (4.7%)
IDH1 R172 mutation, n (%)			0.245
Negative	75 (50.3%)	72 (48.3%)
Positive	0 (0%)	2 (1.3%)
RAS mutation, n (%)			0.719
Negative	70 (46.7%)	72 (48%)
Positive	5 (3.3%)	3 (2%)
NPM1 mutation, n (%)			1.000	0
Negative	58 (38.7%)	59 (39.3%)
Positive	17 (11.3%)	16 (10.7%)
OS event, n (%)			0.112	2.52
Alive	32 (21.2%)	22 (14.6%)
Dead	43 (28.5%)	54 (35.8%)
*p < 0.05, **p < 0.01, ***p < 0.001, ****p < 0.0001
